# Supplementary material
Source: PubMed Central journal article supplement (PMC2713512)

### Supplemental figures

Supplemental figure 1. Optical stopped flow double mixing reaction of KatG[WT] and KatG[S315G] with peroxide (PAA, 2 s delay, PAA). Absorbance vs. time traces at 407 nm are shown beginning after the second mixing step.

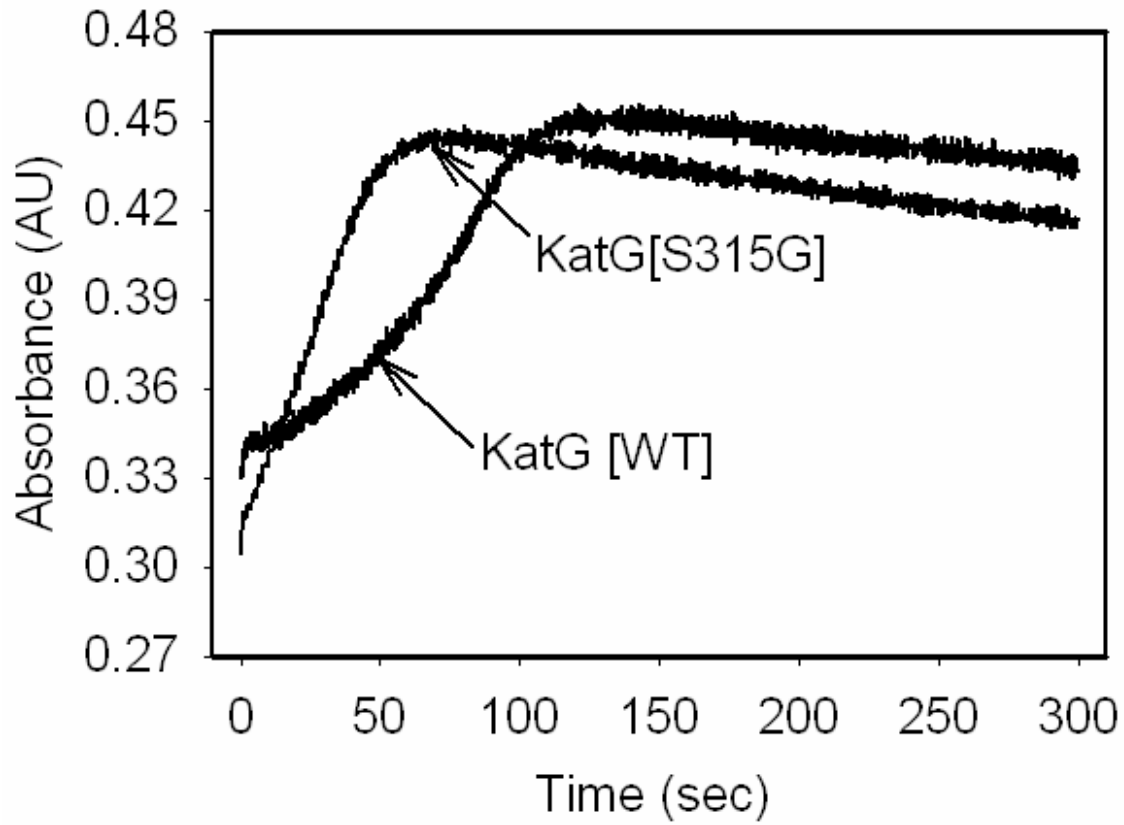

**Supplemental Figure 2: RFQ-EPR of KatG [S315G] treated with 3-fold molar excess of PAA.** Resting enzyme (100  $\mu\text{M}$  final) was mixed with PAA (300  $\mu\text{M}$  final) and freeze-quenched after 250 ms. This signal is due to a peroxy radical.

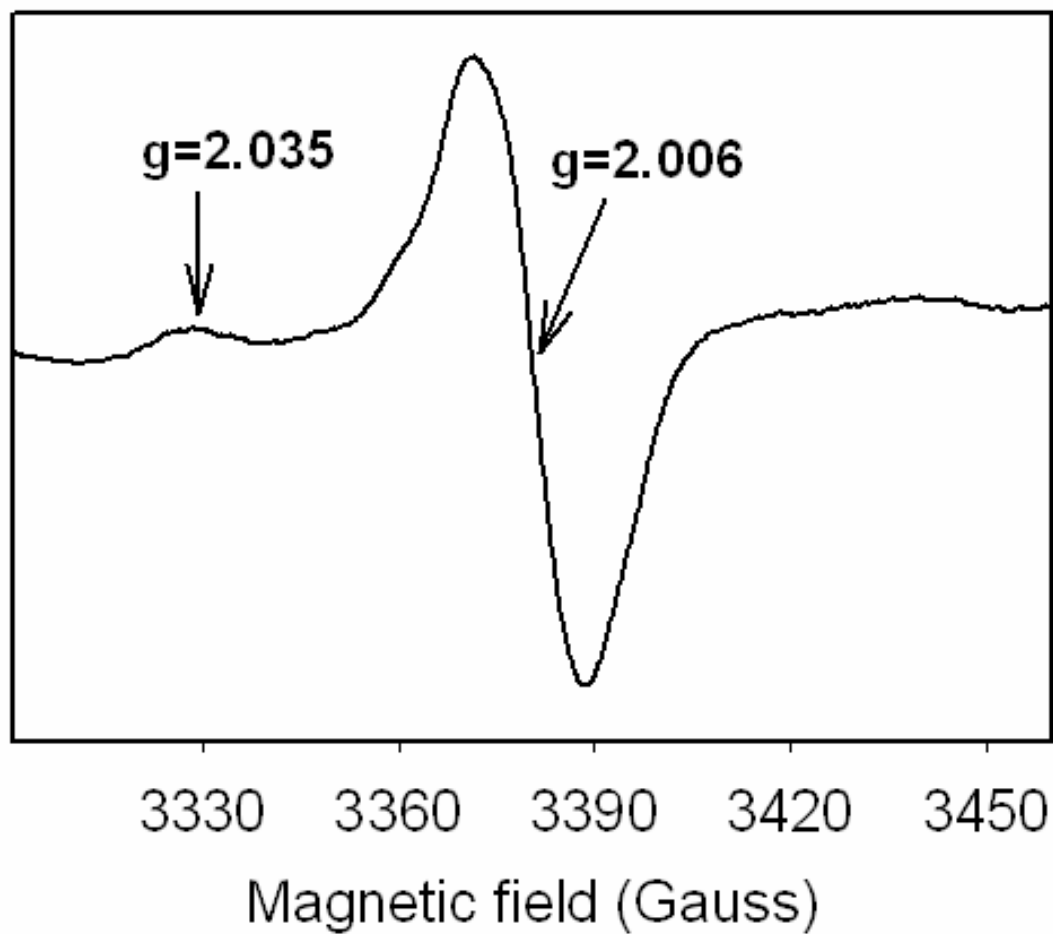

Supplement: supp_M109.005546_jbc.M109.005546-1.pdf [file supp_M109.005546_jbc.M109.005546-1.pdf]
